# Supplementary material for: A Green Chemical Approach for Iodination of Pyrimidine Derivatives by Mechanical Grinding under Solvent-Free Conditions
Source: MDPI journal article supplement (doi:10.3390/molecules27196386), 2022-09-27
Supplement: s1 [file s1]

**Supporting Information for A green chemistry approach for iodination of pyrimidine derivatives by mechanical grinding under solvent-free conditions**

**Thananjeyan Balasubramaniam<sup>1,§</sup>, Byeong-Seon Kim<sup>2,§</sup>, Badvel Pallavi<sup>2</sup>, Ho-seong Jin<sup>1</sup>, Sung Kuk Kim<sup>1,\*</sup> and Joon-Hwa Lee<sup>1,\*</sup>**

(A)

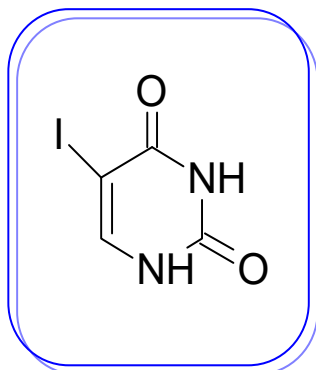

(B)

20220310 5- C BASE (SOLID)

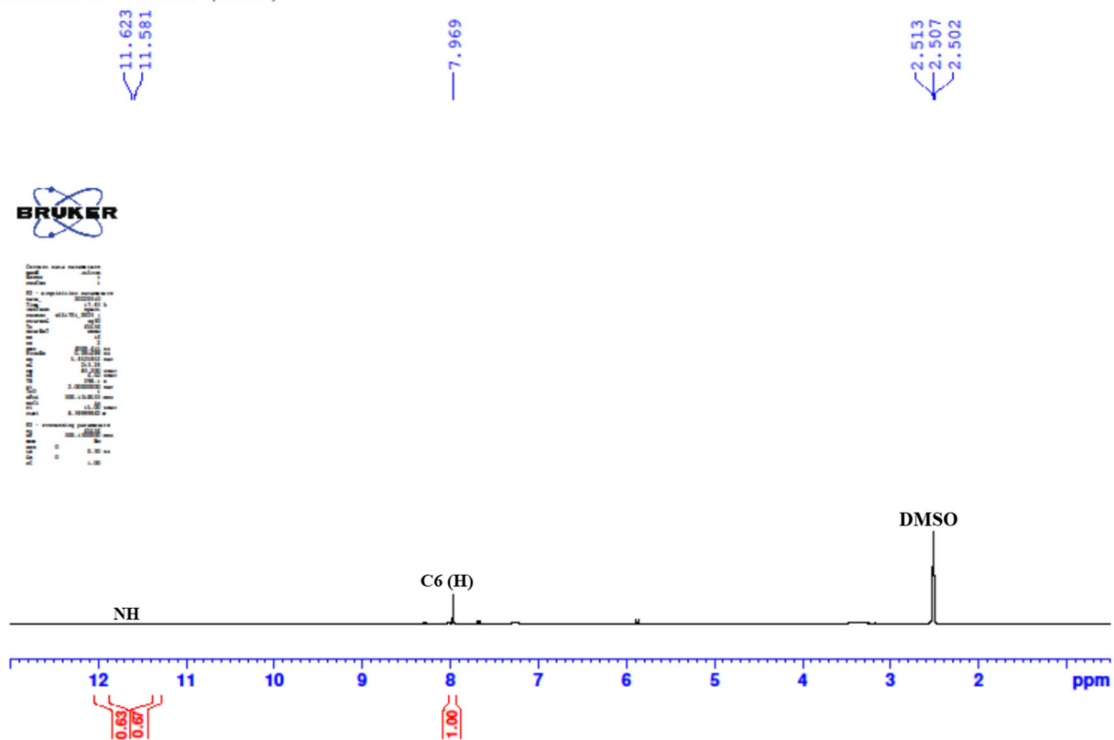

(C)

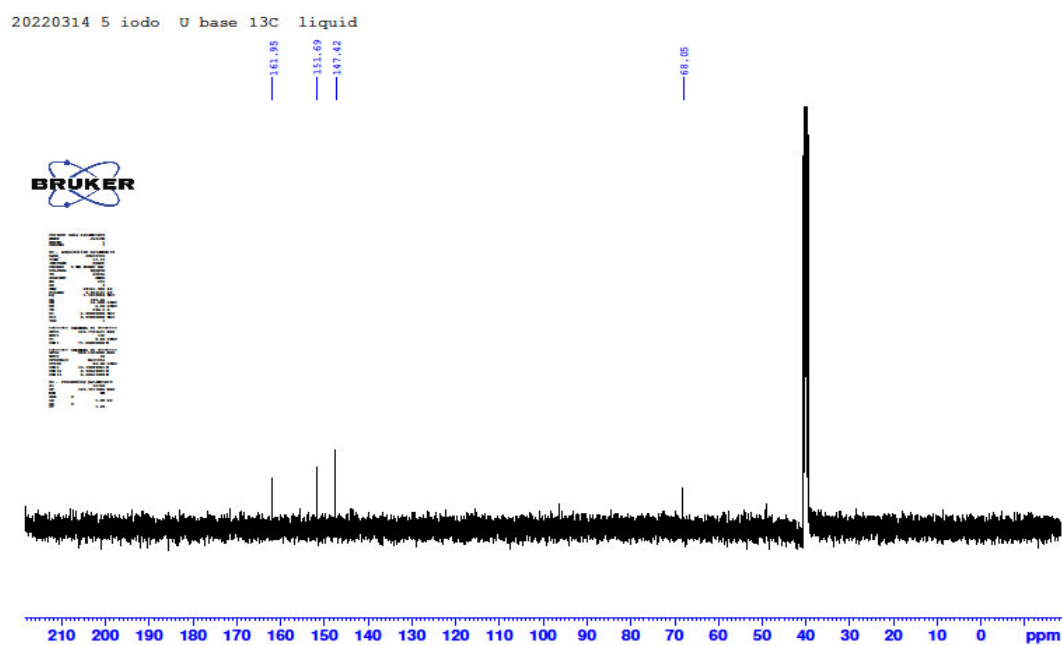

(D)

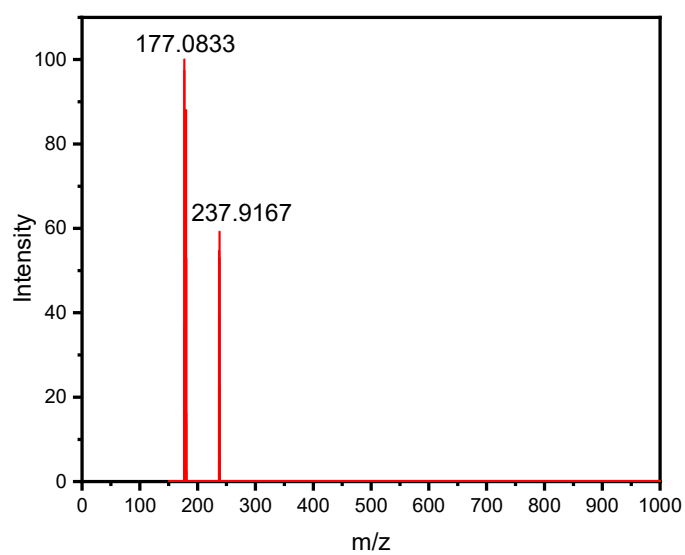

**Figure S1.** (A) Chemical structure and (B) <sup>1</sup>H NMR, (C) <sup>13</sup>C NMR, and (D) ESI-Mass spectra of 5-iodo-uracil (5I-U).

O=C1NC(=O)C(I)=CN1[C@H]2O[C@H](CO)[C@@H](O)[C@H]2O

20220308 5-IDO rU

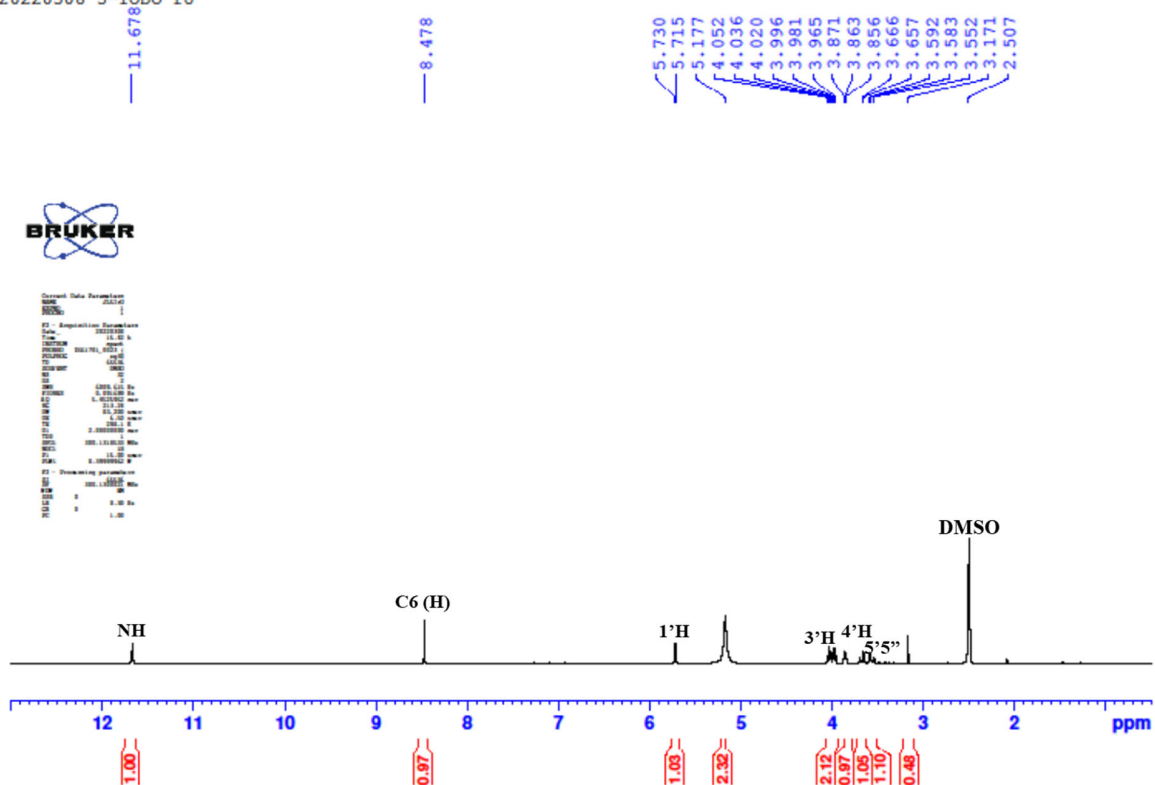

(C)

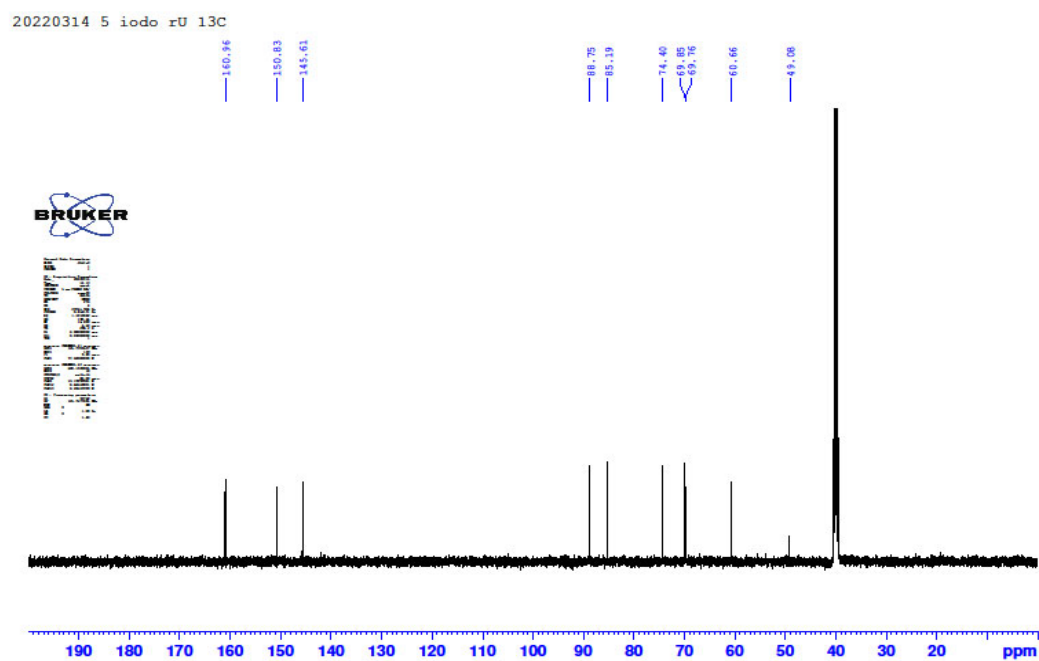

(D)

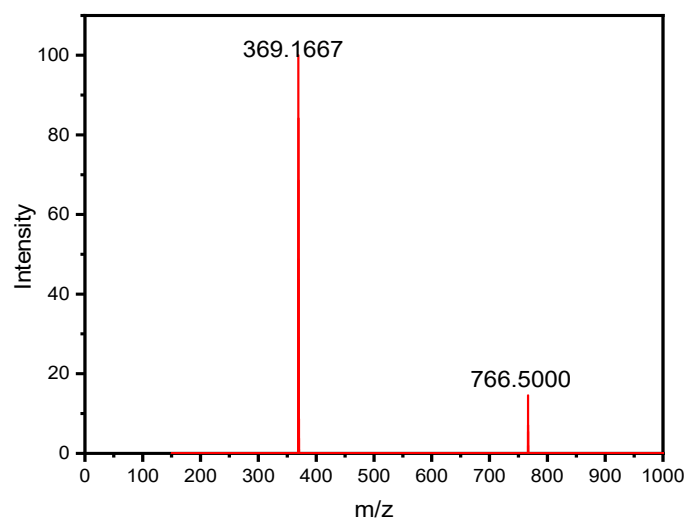

**Figure S2.** (A) Chemical structure and (B)  $^1\text{H}$  NMR, (C)  $^{13}\text{C}$  NMR, and (D) ESI-Mass spectra of 5-iodo-uridine (5I-rU).

(A)

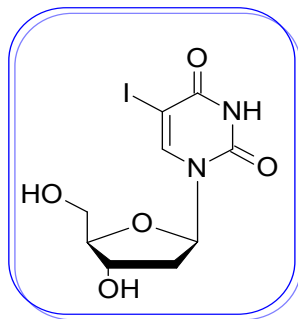

(B)

20220308 5-IODO du

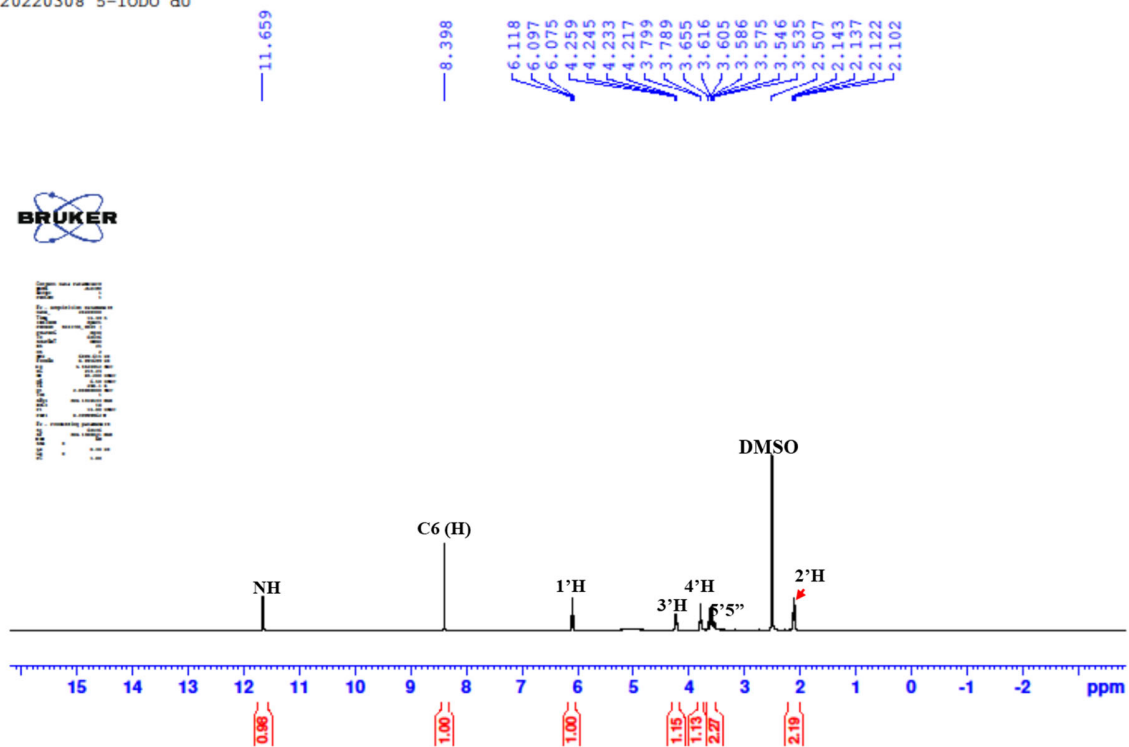

(C)

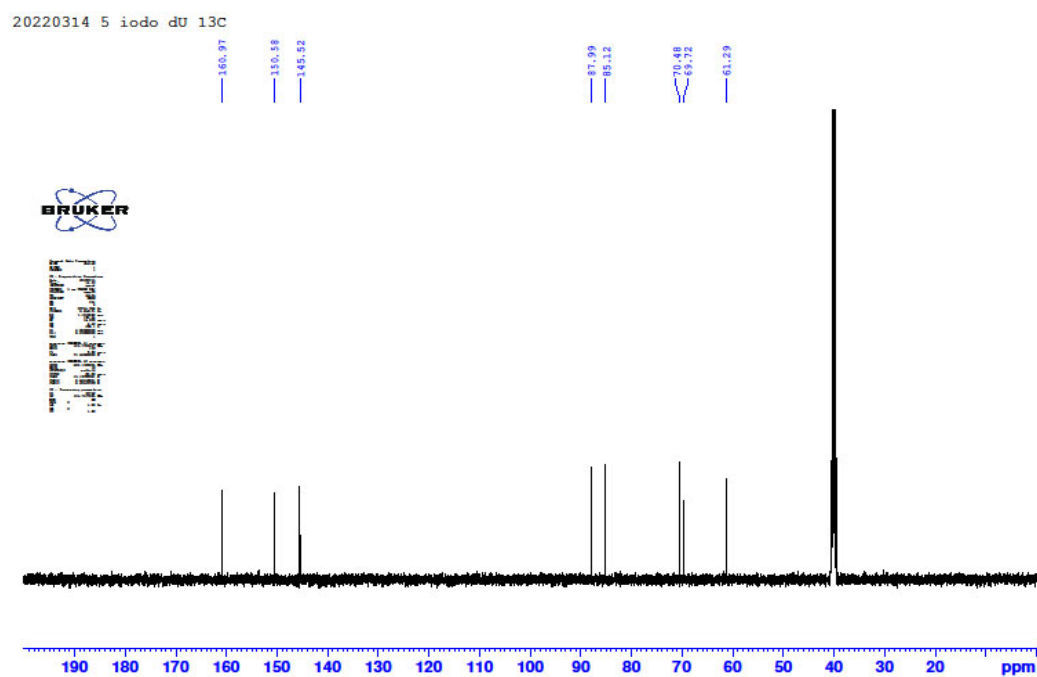

(D)

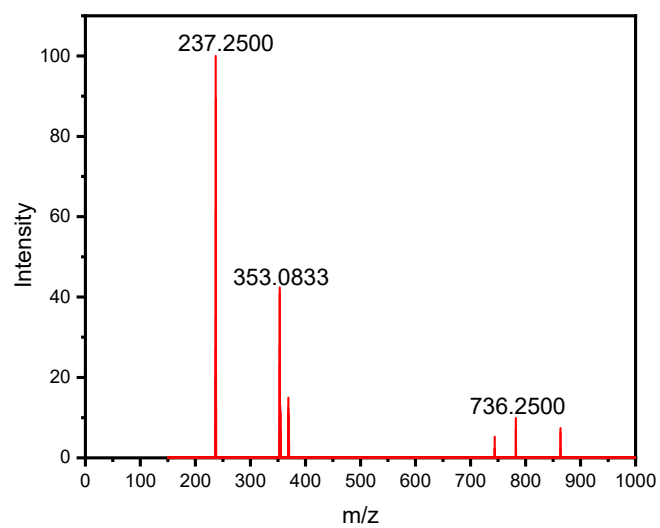

**Figure S3.** (A) Chemical structure and (B)  $^1\text{H}$  NMR, (C)  $^{13}\text{C}$  NMR, and (D) ESI-Mass spectra of 5-iodo-2'-deoxyuridine (5I-dU).

(A)

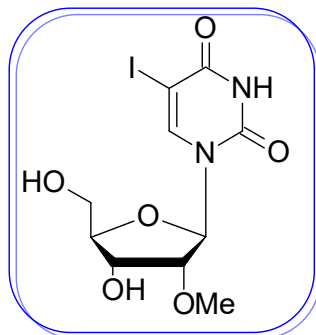

(B)

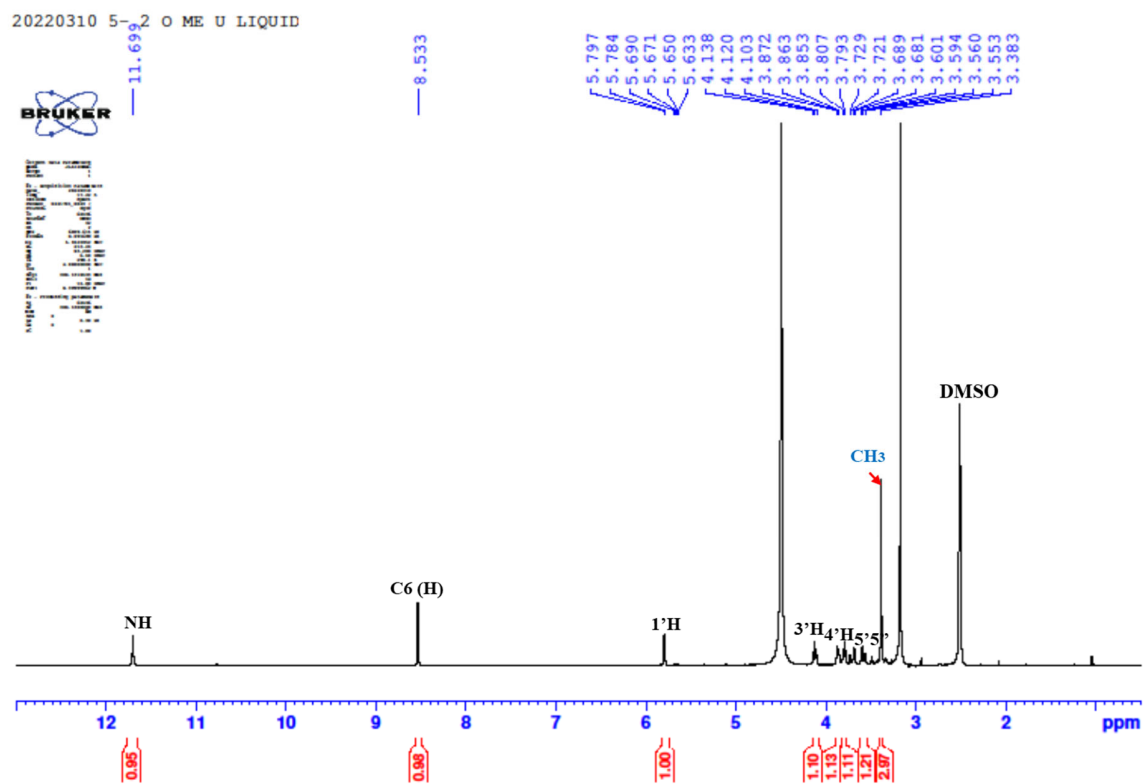



(C)

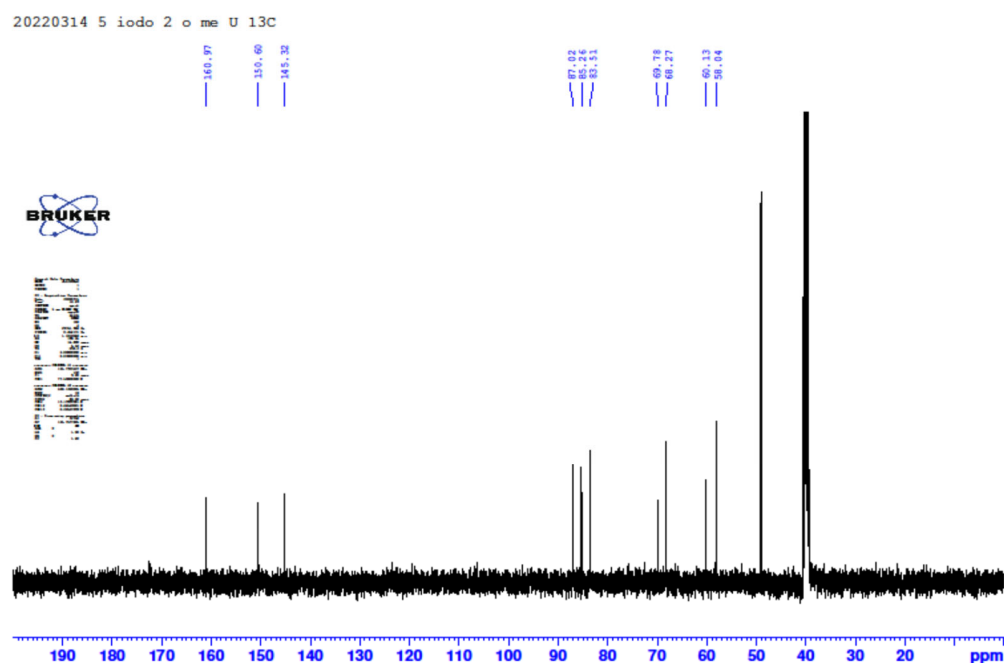

(D)

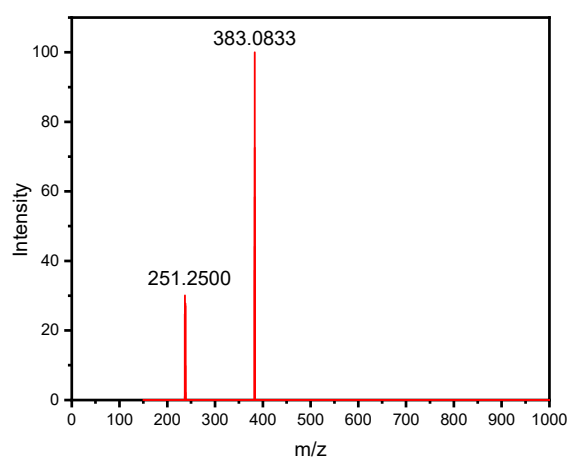

**Figure S4.** (A) Chemical structure and (B)  $^1\text{H}$  NMR, (C)  $^{13}\text{C}$  NMR, and (D) ESI-Mass spectra of 5-iodo-2'-OMe-uridine (5I-mU).

NC1=NC(=O)C=CI

20220310 5- C BASE (SOLID)

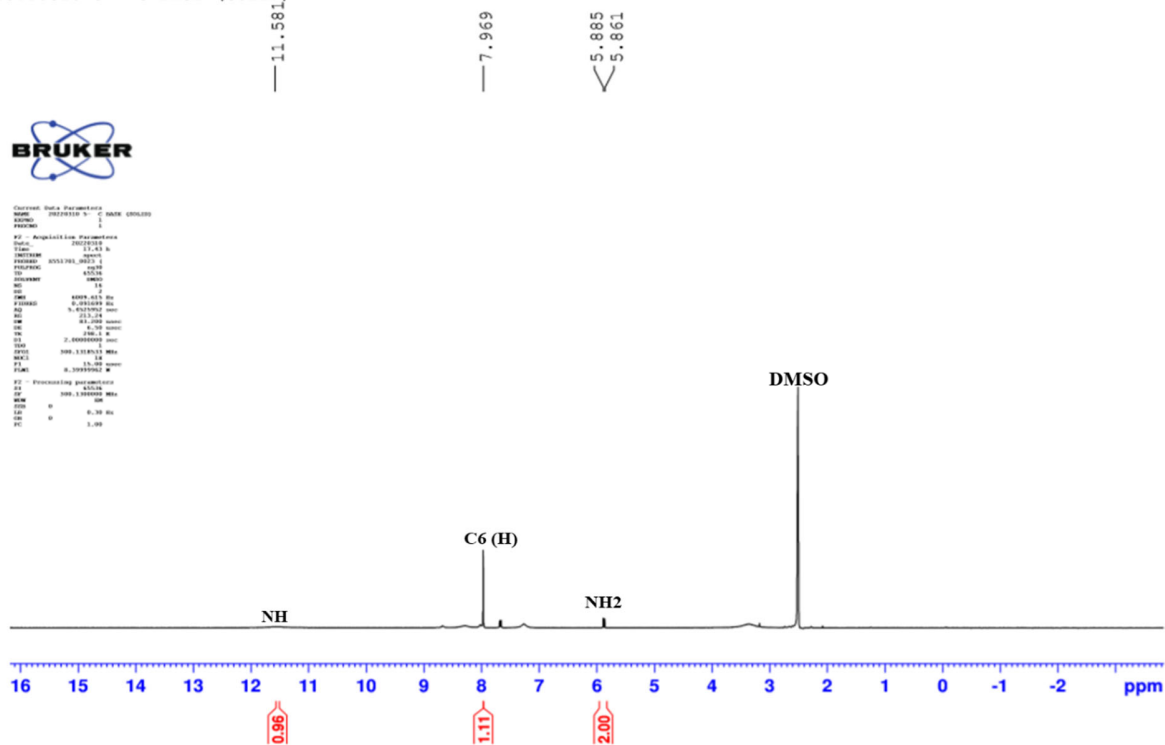

(C)

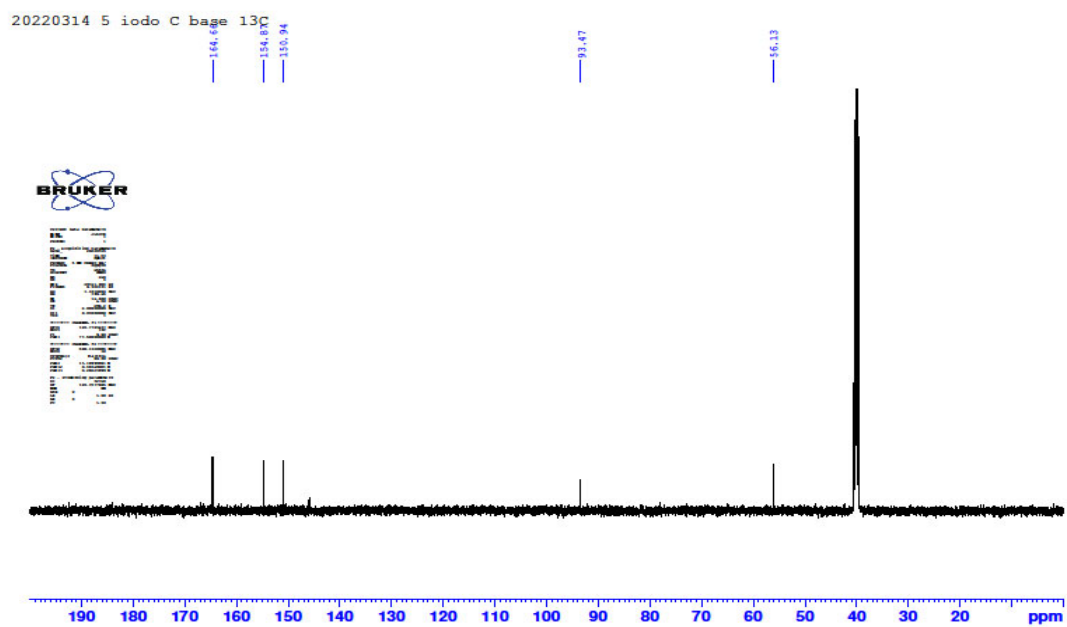

(D)

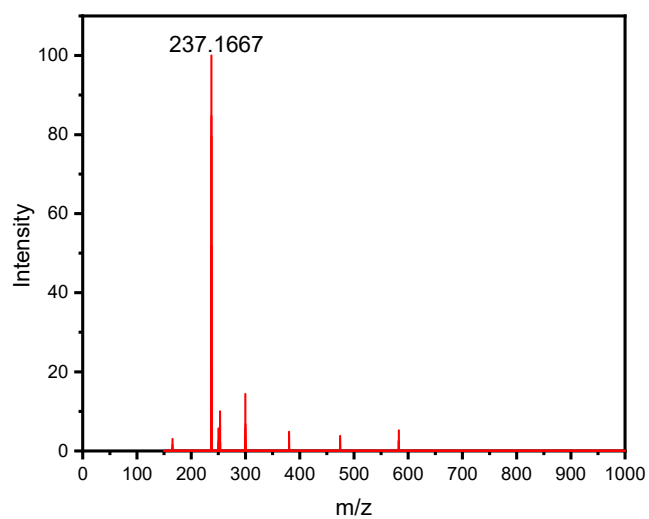

**Figure S5.** (A) Chemical structure and (B)  $^1\text{H}$  NMR, (C)  $^{13}\text{C}$  NMR, and (D) ESI-Mass spectra of 5-iodo-cytosine (5I-C).

(A)

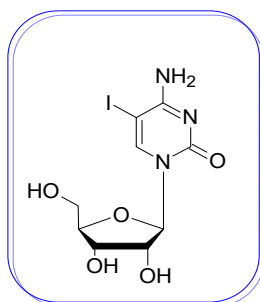

(B)

20220423 5-iodo rC solid 1

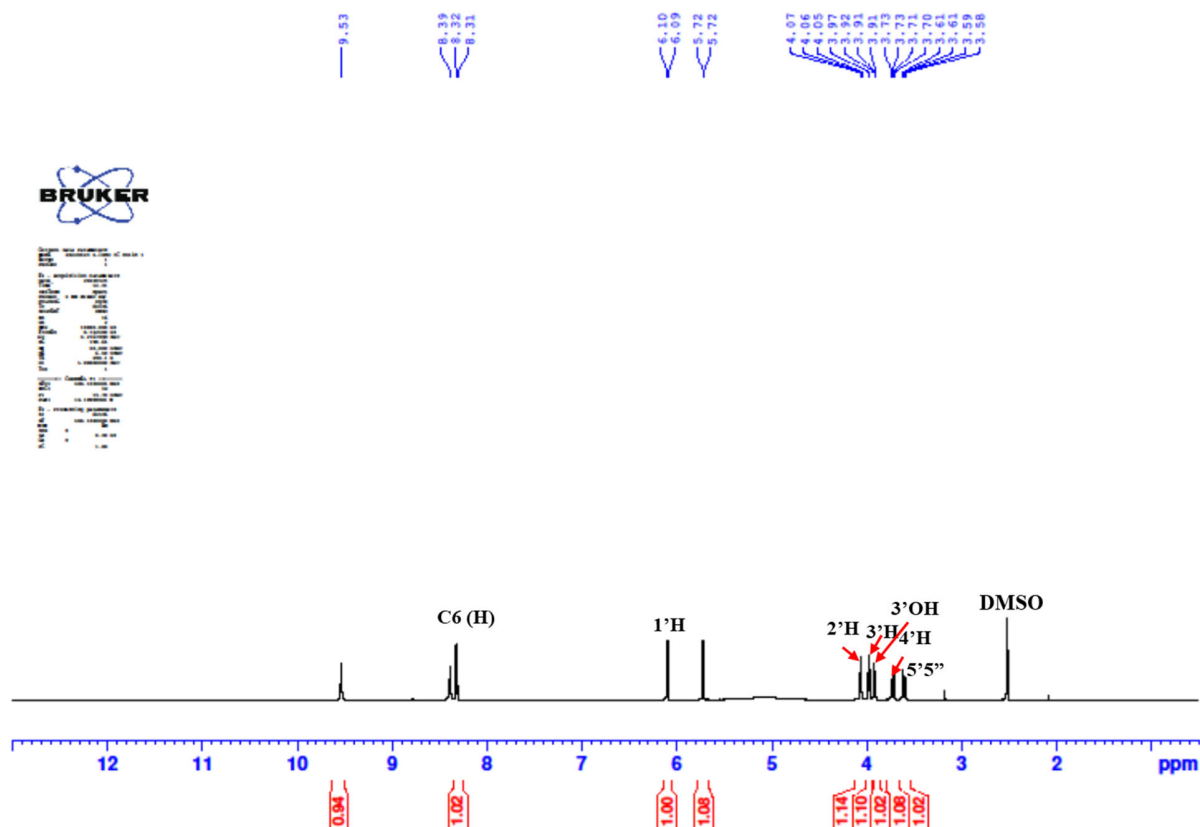

(C)

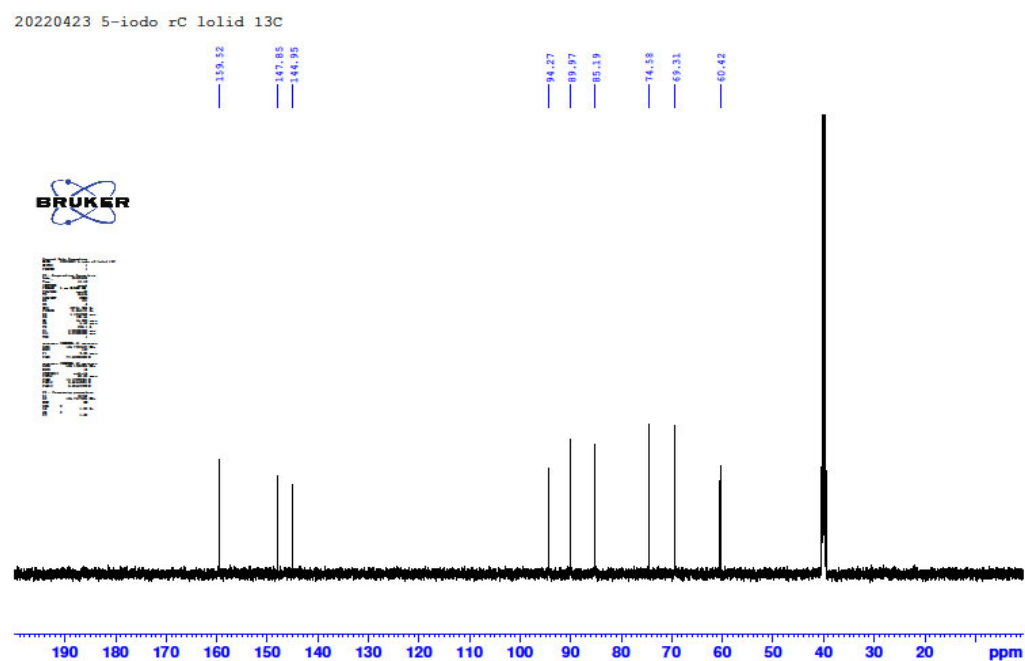

(D)

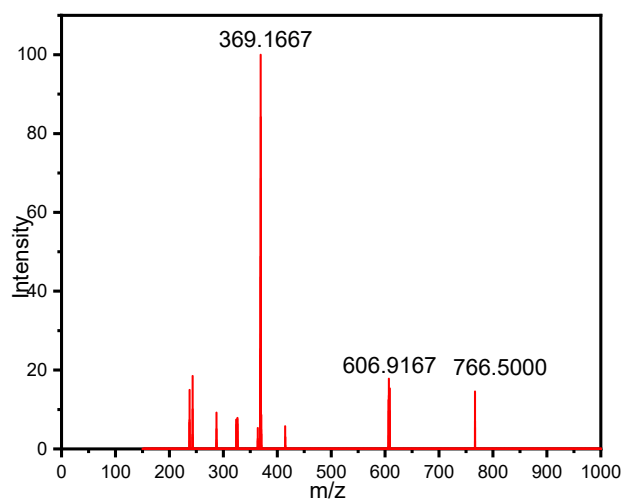

**Figure S6.** (A) Chemical structure and (B)  $^1\text{H}$  NMR, (C)  $^{13}\text{C}$  NMR, and (D) ESI-Mass spectra of 5-iodo-cytidine (5I-rC).

NC1=NC(=O)N(C1[C@H]2O[C@H](CO)[C@@H](O)[C@H]2O)C=C(I)C1=CC=CC=C1

20220217 5 iodo dC solid 1

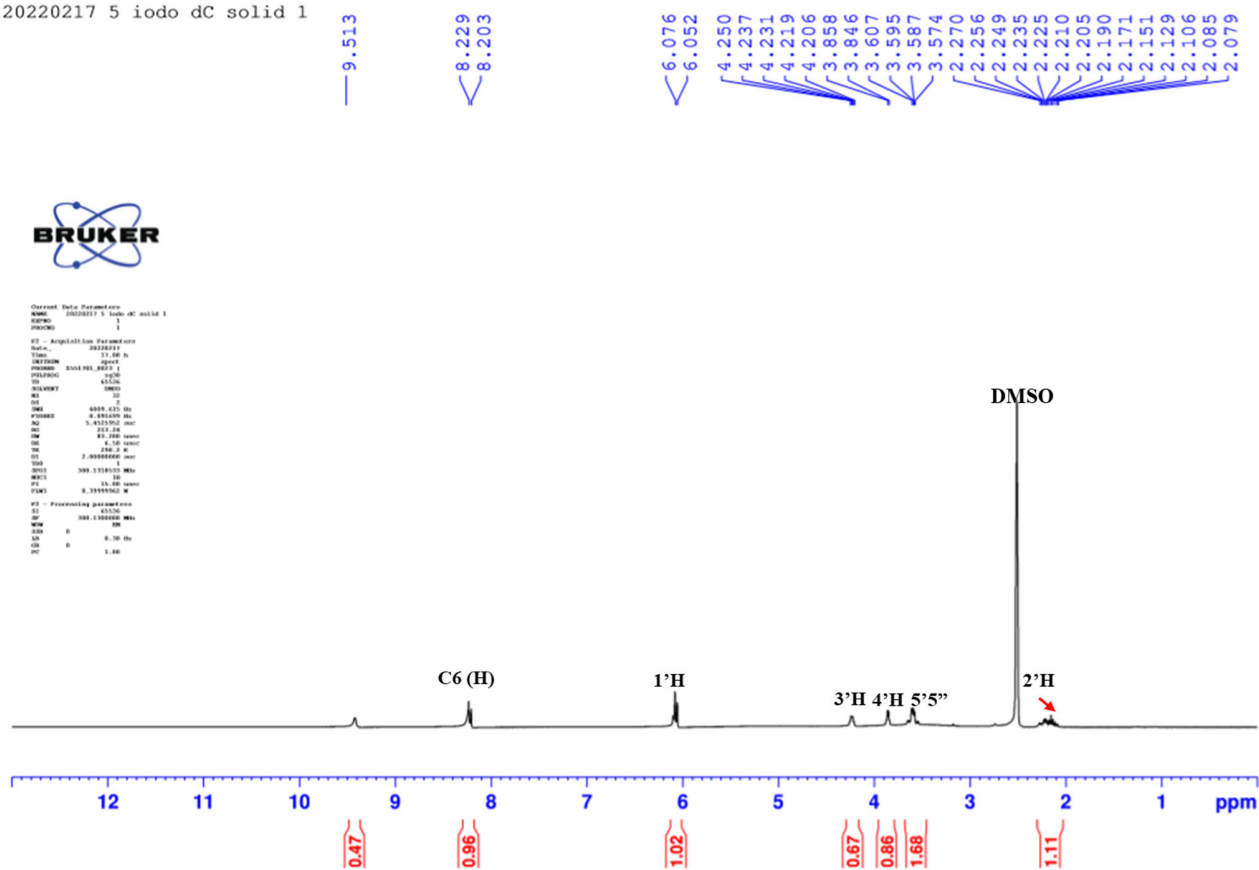

(C)

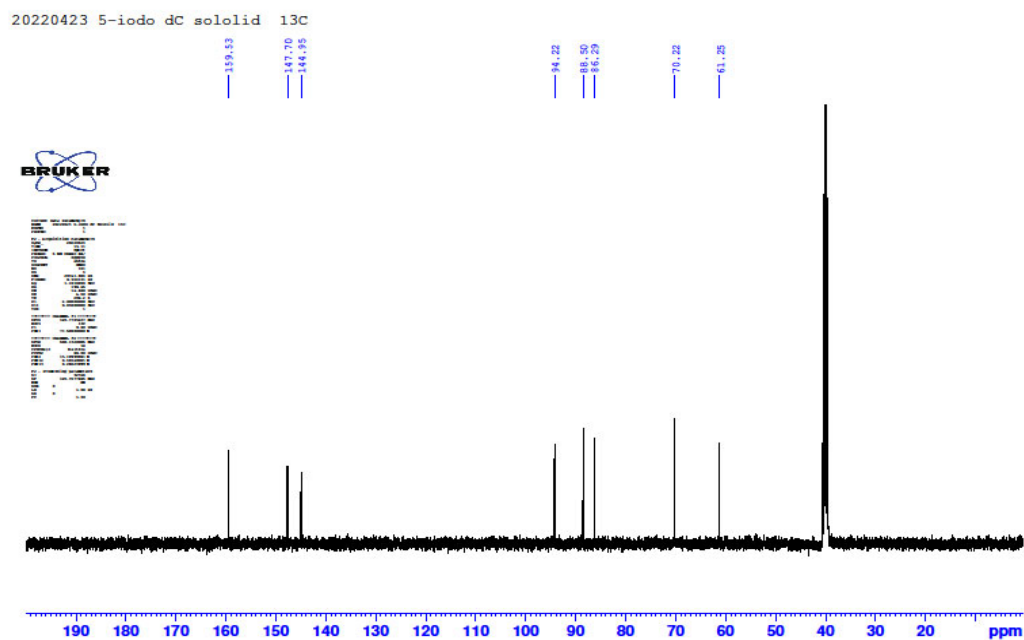

(D)

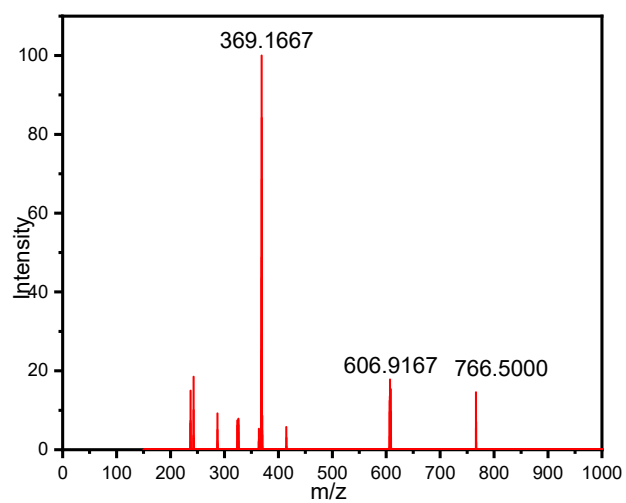

**Figure S7.** (A) Chemical structure and (B)  $^1\text{H}$  NMR, (C)  $^{13}\text{C}$  NMR, and (D) ESI-Mass spectra of 5-iodo-2'-deoxycytidine (5I-dC).

(A)

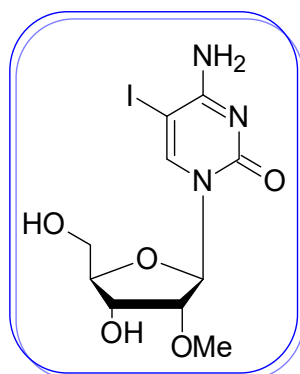

(B)

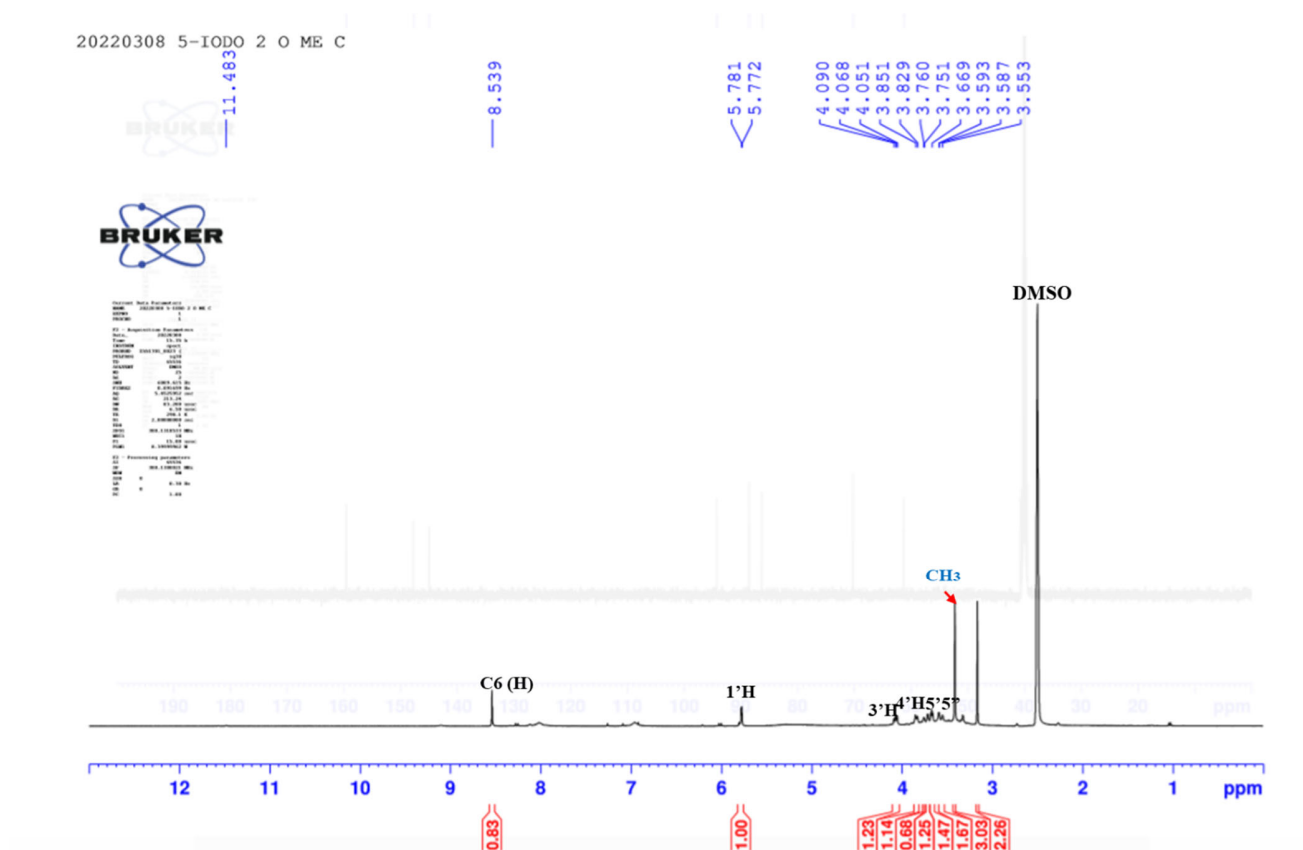



(C)

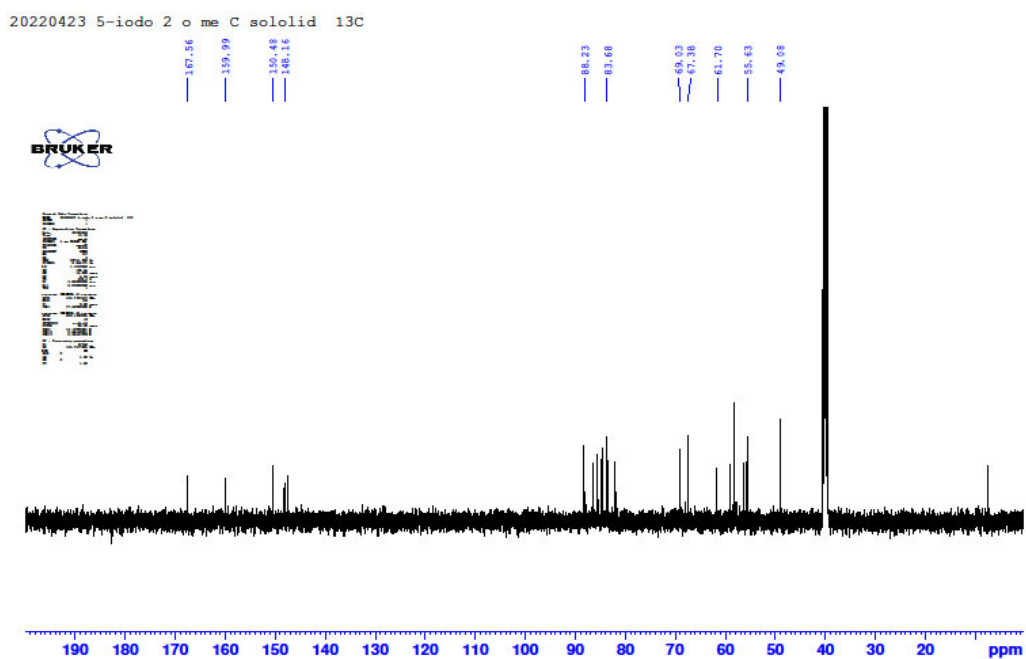

(D)

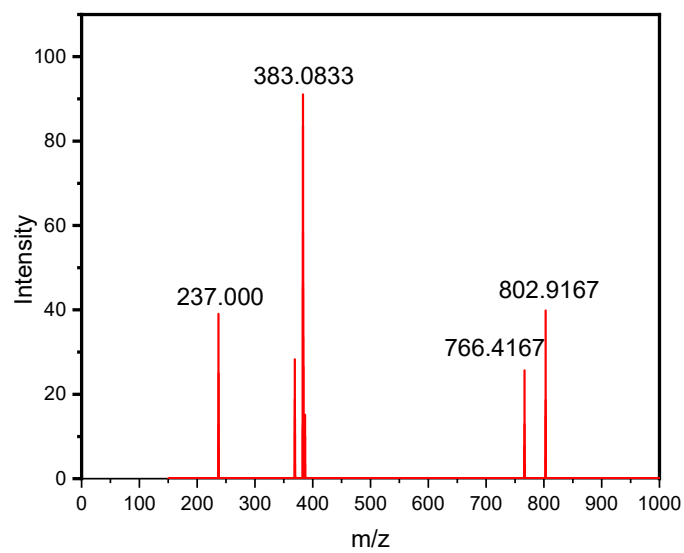

**Figure S8.** (A) Chemical structure and (B)  $^1\text{H}$  NMR, (C)  $^{13}\text{C}$  NMR, and (D) ESI-Mass spectra of 5-iodo-2'-OMe-cytidine (5I-mC).

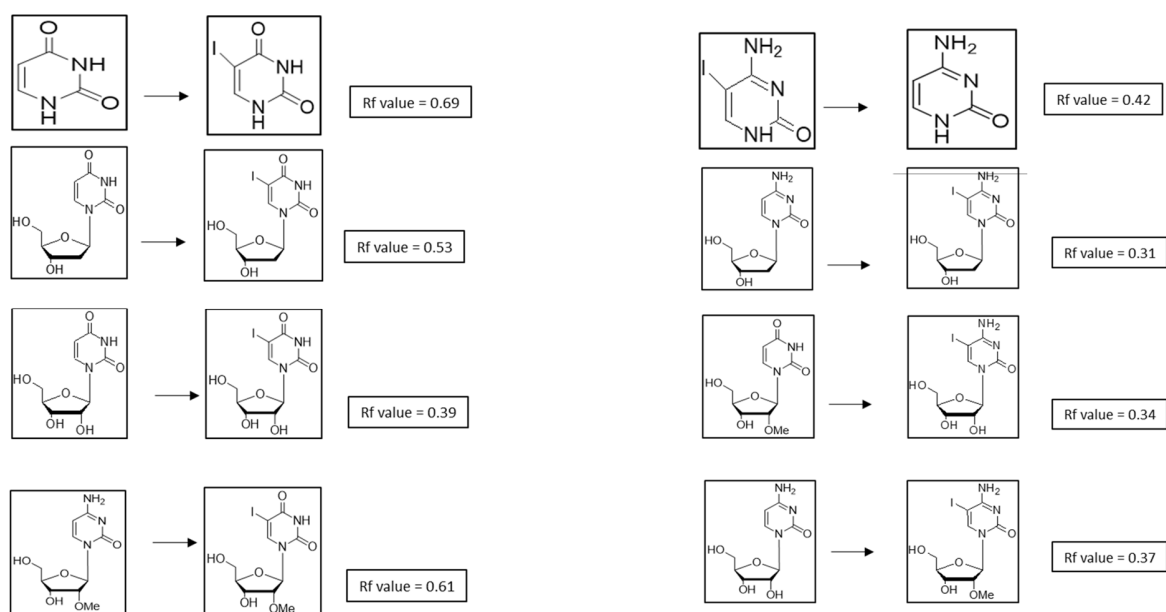

**Figure S9.** The TLC Rf values of fractions of 5-iodo pyrimidine derivatives (solvent  $\text{CH}_2\text{Cl}_2:\text{MeOH}$  (5:1)).
